# Supplementary material for: A plasma membrane-targeted cytosolic domain of STIM1 selectively activates ARC channels, an arachidonate-regulated store-independent Orai channel
Source: PubMed Central journal article supplement — Channels (Austin). 2012 Sep 1;6(5):370–8. doi: 10.4161/chan.21947 (PMC3508776; doi:10.4161/chan.21947), 2012-09-01
Supplement: chan-6-370-s01.pdf [file chan-6-370-s01.pdf]

## **Supplemental Material to:**

**Jill Thompson and Trevor J. Shuttleworth**

**A plasma membrane-targeted cytosolic domain of  
STIM1 selectively activates ARC channels, an  
arachidonate-regulated store-independent Orai channel**

**Channels 2012; 6 (5)**

**<http://dx.doi.org/10.4161/chan.21947>**

**<http://www.landesbioscience.com/journals/channels/article/21947/>**

## Supporting Information:

### SI Methods

**Electrophysiology Solutions.** For the Flp-In HEK293 cells, the standard extracellular solution contained 140 mM NaCl, 5 mM CsCl, 1.2 mM MgCl<sub>2</sub>, 10 mM CaCl<sub>2</sub>, 30 mM glucose, and 10 mM Hepes (pH 7.4). The standard internal (pipette) solution contained 140 mM CsC<sub>2</sub>H<sub>3</sub>O<sub>2</sub>, 3.5 mM CaCl<sub>2</sub>, 3.72 mM MgCl<sub>2</sub>, 10 mM EGTA, and 10mM Hepes (pH7.2). The calculated free Ca<sup>2+</sup> concentration was 100 nM. For activation of store-operated CRAC channels, this internal solution was changed to 140 mM CsC<sub>2</sub>H<sub>3</sub>O<sub>2</sub>, 4.17 mM MgCl<sub>2</sub>, 10 mM EGTA, and 10 mM Hepes (pH 7.2) plus 2 μM adenophostin A. For experiments with the RBL-cells, the standard extracellular saline contained 120 mM NaCl, 2.8 mM KCl, 10 mM CsCl, 2 mM MgCl<sub>2</sub>, 10 mM CaCl<sub>2</sub>, 10 mM glucose, 10 mM Hepes (pH 7.4), and the standard internal (pipette) solution contained 120 mM Cs-glutamate, 8 mM NaCl, 3 mM MgCl<sub>2</sub>, 10 mM Cs-BAPTA, 10 mM Hepes (pH7.2) plus 2 μM adenophostin A.

**Constructs.** cDNA encoding human STIM1 was obtained from Dharmacon Inc., (Chicago, IL, USA), and modified to render it siRNA-resistant as described. To generate the Lck-STIM1-C construct, two oligonucleotides (sense and antisense) were generated to prepare an insert coding for the plasma membrane targeting sequence of the Lck kinase (MGCGCSSHPE) followed by a hydrophobic linker (TKLTEER) which included an EcoR1 site at the beginning and an Acl1 site at the end, in-frame with the STIM1 C-terminal region. Following phosphorylation and annealing of these sequences, the insert was ligated to the STIM1 C-terminus position 251-685 (cloned out using PCR including an Acl1 site at the beginning and a Xho1 site following the stop

codon) and inserted into a pcDNA3.1<sup>+</sup> backbone (Invitrogen). For experiments requiring an C-terminally eGFP-tagged version (Lck-STIM1-C-eGFP), a phosphorylated and annealed linker (AflIII to BamH1) was used to remove the stop codon from the above construct, and to allow sub-cloning into a pEGFP-n3 backbone (Invitrogen) in frame with the eGFP.

STIM1-CT constructs were generated by first removing the Lck domain from either the Lck-STIM1-C or Lck-STIM1-C-eGFP construct, as appropriate, using primers designed to introduce a Kpn1 site and a methionine start codon immediately prior to position 251 and the Pml1 site within the C-terminus. The Kpn1/Pml1 cut PCR product was then ligated to a Kpn1/Pml1 cut Lck-STIM1-C backbone.

The S-to-A mutant Lck-STIM1-C constructs were prepared by designing five oligonucleotides (2 sense and 3 antisense) corresponding to the SacII to Acl1 sites in the Lck-STIM1-C construct modified by changing the residue at position 6 in the Lck domain from a serine to an alanine. The oligonucleotides were phosphorylated, annealed and ligated to the Lck-STIM1-C SacII to Acl1 cut backbone.

For the N-terminally eGFP-tagged STIM1-C-CAAX construct, oligonucleotides were designed to add a CAAX box domain to the STIM1 C-terminus including a AflIII site at the 5' end and a BamH1 site at the 3' end. These were phosphorylated, annealed and ligated, along with a Kpn1 to AflIII STIM1-CT fragment, to a Kpn1/BamH1 cut pAcGFP1-C1 backbone.

All constructs were confirmed by sequencing of the protein coding regions.

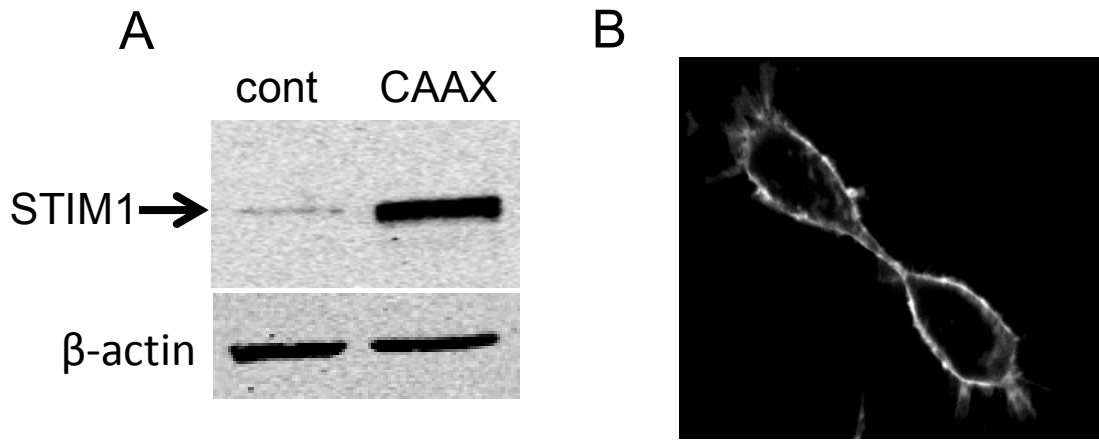

**Figure S1. Expression of the STIM1-C-CAAX construct.** (A) Western blot of cell lysates obtained from control untransfected FlpIn HEK293 cells (cont) and the same cells transfected with the siRNA-resistant STIM1-C-CAAX construct (CAAX). The resulting gel was stained with a STIM1 C-terminal pAb (Cell Signaling). The same gel was then stripped and reprobed with a  $\beta$ -actin Ab as indicated. (B) Live confocal image of FlpIn HEK293 cells expressing the eGFP-tagged STIM1-C-CAAX construct.

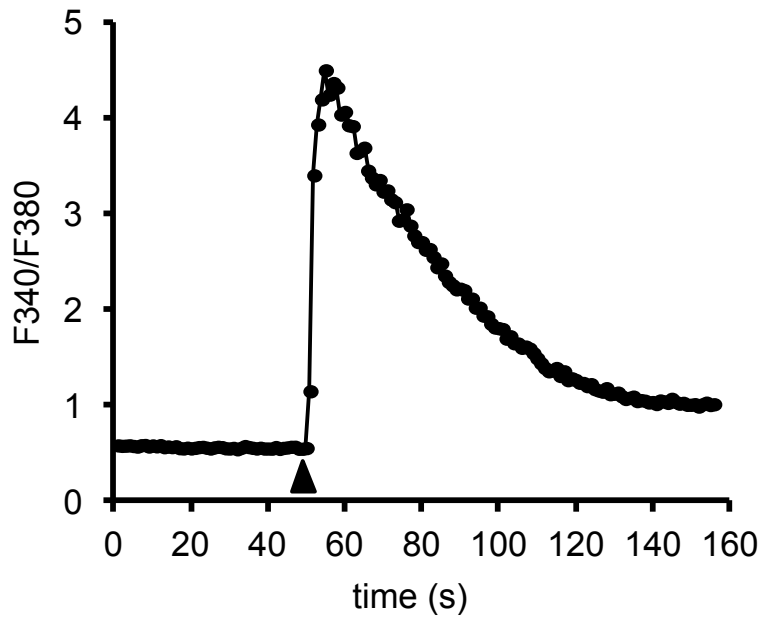

**Figure S2. Representative trace of the agonist-induced changes in cytosolic  $\text{Ca}^{2+}$  concentration in HEK293 cells stably expressing the m3 muscarinic receptor.** Cytosolic  $\text{Ca}^{2+}$  was measured by fura-2 fluorescence ratio imaging, as described. Carbachol (10  $\mu\text{M}$ ) was added at the arrow.
